# **Hammersmith Neonatal Neurological Examination of healthy term infants at ages 6 and 10 weeks in Tshwane District, South Africa**

**\*Marna Nel<sup>1,2,3</sup>, Ute Feucht<sup>1,2,4</sup>, Helen Mulol<sup>1,2,4</sup>, Carina Eksteen<sup>3</sup>**

<sup>1</sup>Research Centre for Maternal, Foetal, Newborn and Child Health Care Strategies, University of Pretoria, Pretoria, South Africa

<sup>2</sup>Maternal and Infant Health Care Strategies Research Unit, South African Medical Research Unit, Pretoria, South Africa

<sup>3</sup>Department of Physiotherapy, Sefako Makgatho Health Science University, Ga-Rankuwa, South Africa

<sup>4</sup>Department of Paediatrics, University of Pretoria, Pretoria, South Africa

**\*Corresponding author:**

E-mail: [mnfis@mweb.co.za](mailto:mnfis@mweb.co.za)

## **Abstract**

### **Background**

The neurodevelopmental progress of infants below 3 months is globally not well described. A lack of published data on normative values of child development in this age group has been identified. In South Africa (SA), neurodevelopmental characteristics of infants at well-baby 6- and 10-week visits are omitted from the ‘Road to Health Booklet’, a nationally used patient-held clinical record. The neurodevelopmental status of infants in these age groups is not routinely monitored and data not documented. Important changes occur in the maturation of the central nervous system of infants at 6 weeks that mark this age as an important milestone for monitoring neurodevelopmental progress.

### **Methodology and findings**

A prospective longitudinal study was performed on a sample of 35 healthy term-born, infants from low-risk pregnancies at 6- and 10-weeks postnatal age in the Tshwane District, SA. The status of infants’ posture, tone, reflexes, movements, orientation and behaviour were recorded on the Hammersmith Neonatal Neurological Examination (HNNE). Cut-off points on the 5th and 10th centiles, according to the HNNE ‘optimality scoring system’, were applied to the raw scores of the 34 items in the proforma evaluation form. This study quantitatively supports patterns of characteristic change occurring in muscle tone, posture, and visual behaviour of infants between 6 and 10 weeks.

### **Conclusion and significance**

This study recorded data on the neurodevelopmental assessment of infants from low-risk pregnancies at 6- and 10 weeks post-term age in Tshwane District, SA. The optimality scores obtained in this initial study in a low-middle-income country can guide health professionals

using this method of examination during early neurodevelopmental screening at well-baby clinics. Further research is necessary to develop a SA norm for identifying the motor and neuro-behavioural characteristics of 6- and 10-week-old infants.

## Introduction

Neurodevelopmental progress in early infancy (age below 3 months) is globally not well described. Adverse maternal and foetal factors leading to stillbirth e.g., placental insufficiency, often cause morbidities such as foetal growth restriction, premature birth, and neonatal encephalopathy in surviving and high-risk infants [1-7]. These conditions are associated with insults to the foetal and neonatal brain and result in altered neural pathways from an early age leading to deviant neonatal behaviour, impaired neurological maturation, and neurodevelopmental delays [8 - 15].

Developing countries are burdened with high numbers of young children who fail to reach their developmental potential [16, 17]. Hence, health care professionals are urgently called to identify at-risk infants and contribute to sustainable early childhood intervention by addressing and limiting adverse short- and long-term development sequelae in surviving and high-risk infants [7, 14, 16, 18-25].

The development of infants beyond the neonatal period, in particular at the 6- and 10-week postnatal age intervals, has been found to lack standardised normative values and detailed descriptions of milestone characteristics. In a follow-up study of healthy term infants, Guzzetta et al., (2005) described changes that occurred between birth and 3- to 10 weeks post-term age in the domains of *muscle tone*, *posture*, and *visual orientation*. The characteristics of change identified in these domains emphasized that the 6 weeks post-term age provides notable information and guidance that may enable health care professionals to identify and document the neurological maturation of infants beyond the neonatal period [26].

In South Africa (SA) health care professionals use the patient-held clinical record called the ‘Road-to-Health booklet’ (RtHB) to document child growth, immunization and developmental

progress during routine postnatal follow-up visits at primary healthcare facilities [27]. This RtHB is incomplete in its description of developmental milestones for infants aged 6 and 10 weeks. The public health sector in SA provides services to approximately 84% of its 55 million people and the current birth rate per woman is 2.4% [28]. This means that a great number of infants in the age groups 6 and 10 weeks are not routinely monitored in terms of their neurodevelopmental progress and data regarding their neurological maturation process is therefore not documented [29].

The specific characteristics in the RtHB that describe the neurodevelopment in the domains of *hearing/communication, vision/visual adaptation, cognition/behaviour, motor skills, and the measurement of head circumference* for 6- and 10-week-old term infants have not yet been included in this RtHB [27].

The repertoire of neurodevelopmental characteristics omitted from the RtHB correlates with the domains of infant neurodevelopment contained in the Hammersmith Neonatal Neurological Examination (HNNE) [27, 30]. Dubowitz et al., (1980) developed the HNNE in which the fundamental characteristics in the domains of *posture and tone, tone patterns, reflexes, movements, abnormal signs and orientation and behaviour* of newborn term infant development are illustrated and described [30, 31]. The tool's '*optimality scoring system*' enabled a quantitative association of prenatal motor activity with optimal scores in the domains of reflexes and movement patterns in newborn infants from low-risk pregnancies and predicted neurodevelopmental disability at one year [9, 32]. Normative data based on the HNNE optimality scoring system is available for preterm infants at term equivalent-, late preterm-, and infants at term age [15, 33-35].

The assessment instrument (HNNE) was developed in a high-middle-income country (HMIC) and has been standardised against predominant Caucasian populations [36, 37]. Discrepancies in optimality scores were demonstrated between low-risk term-born infants in low-resource settings in Uganda and Ghana and the low-risk term-born infant population in the United Kingdom (UK) where the optimality scoring system was originally developed [38, 39].

Optimality scores based on studies in some developing countries raised questions about the applicability of the optimality scores of the original UK population in such countries [38-41]. Nevertheless, the test continued to successfully indicate deviating performance in high-risk neonatal populations [42-44, 46]. Valuable data were reported on neurodevelopmental screening in various developing countries and resource-limited conditions [38-41, 46, 52].

Further studies were recommended for infants from varying populations whose development can be longitudinally monitored to establish reliable normative global data for this age range [26, 32, 39, 52]. Population-level markers, such as optimality scores, for infants in the age groups 6- and 10 weeks from developing countries may enable health care professionals' effective monitoring of infant neurodevelopment during this window period, making timeous intervention at an early stage possible [22, 23, 25, 46].

Therefore, the first aim of this study was to assess and attribute scores to the distribution of neuro-behavioural characteristics of healthy 6- and 10-week term infants born from mothers with low-risk pregnancies according to SA ante-natal guidelines [47] in the Tshwane District in SA by implementing the HNNE. The second aim was to apply the HNNE optimality scoring system to the raw scores (RSs) obtained by this cohort of 6- and 10-week term infants. To our knowledge, no data of its kind in this age group has previously been documented.

## **Material and Methods**

A prospective, longitudinal descriptive study was undertaken to assess and attribute RSs to the distribution of the neuro-behavioural characteristics of 6- and 10-week-old infants in Tshwane District, SA between October 2019 and June 2020. Secondly, the HNNE optimality scoring system was applied to convert the frequency distribution of the RSs to optimality scores.

### **Study population**

A cohort of thirty-five (35) infants that formed part of an ongoing ante-, peri-, and postnatal investigation - i.e., Umbiflow International Study and the UmbiBaby Study - were selected for participation in this study. Permissions to conduct the study were obtained through the University of Pretoria Research Ethics Committee (reference no. 283/2019) as well as institutional permissions from the relevant health services. Only thirty-five of 81 term-born infants participating in the UmbiBaby Study (19 males; 16 females) who attended both their 6- and 10-week neurological assessments were included in this part of the study [48,49].

The infants were born to mothers who were prospectively enrolled in the Umbiflow Study that screened an unselected population of women with low-risk pregnancies (according to SA antenatal guidelines) [48]. The women were screened in the third trimester of their pregnancy (between 28 and 34 weeks) using the low-cost continuous-wave Doppler ultrasound device (Umbiflow™), developed by the South African Medical Research Council (SAMRC) and Council for Scientific and Industrial Research (CSIR) [49, 50].

For the infant follow-up study mothers in Tshwane District were approached around the time of birth at Pretoria West Hospital, Laudium Community Health Centre, and Kalafong Provincial Tertiary Hospital. The mothers of the infants in this study gave written informed consent to participate in the UmbiBaby Study as a mother-infant pair at the 6-week postnatal clinic visit. The mother-infant pair was followed up at the University of Pretoria's Research

Centre for Maternal, Foetal, Newborn and Child Health Care Strategies at Kalafong Hospital for their 6- and 10-week routine postnatal clinic visits.

The inclusion criteria were infants: 1) from mothers with singleton pregnancies; 2) born to mothers with low-risk pregnancies according to local antenatal care guidelines; 3) with known gestational ages, calculated during the Umbiflow Study; 4) who attended both 6- and 10-week clinic visits. The exclusion criteria were infants born to mothers: 1) younger than 18 years of age; 2) infants with chromosomal, structural abnormalities or severe medical conditions.

The neurological assessments were administered by scoring the neuro-behavioural characteristics of the 35 healthy term-born infants at 6- and 10-weeks postnatal age who attended both follow-up assessments. Demographic and nutritional information of the mother-infant pairs were also collected at every visit as part of the ongoing UmbiBaby investigation. The HNNE was administered by a single qualified physiotherapist experienced in administering and interpreting the assessment tool. The therapist is a presenter of the post-basic continuing professional development course called *Exploring Infant Behaviour*. This course aims at training health care professionals to administer and interpret the HNNE based on infant behaviour, as described by Brazelton and Nugent, (1995) in the Neonatal Behavioural Assessment Scale (NBAS) [50].

## **Assessment instrument**

The HNNE is a standardised assessment instrument developed to assess the neurological state of newborn term infants in the first 48 hours after birth [51]. The assessment was developed in the UK and has subsequently been used in clinical and research settings for nearly 40 years [30, 31]. The assessment proforma was modified to its current form and the '*optimality scoring system*' was added and validated on 224 low-risk term infants in the UK within 48 hours after birth [30, 36].



To date, optimality scores have been determined and published for preterm and late preterm infant populations at term-equivalent age [33-36]. Normative data and subsequently optimality scores have not yet been published for term infants beyond this age. In conjunction with neuroimaging and neurophysiological techniques, the HNNE discriminated between clinical patterns associated with neurological conditions such as hypoxic ischaemic encephalopathy, periventricular leukomalacia and intra-ventricular haemorrhage [30, 43, 45]. The HNNE's correlation with other instruments showed total factor scores of  $F_{92.42} = 8.7$ ;  $p < 0.001$ ;  $R^2 = 0.71$  [37, 52]. This examination tool is suitable for clinical application with an administration time of 10 – 15 minutes and has interrater reliability of 96% [31, 40, 53, 54]. The instrument does not require formal training or certification and can be self-taught through the Hammersmith Neurological Examination website [54].

This examination consists of 34 items that are characteristic of the functional state of the newborn infant's central nervous system. These characteristics are categorised in six domains known as *compounds*: 1) *posture and tone*, 2) *tone patterns*, 3) *reflexes*, 4) *spontaneous movements*, 5) *abnormal neurological signs*, and 6) *orientation and behaviour* [30, 31].

**Raw Scores:** The items are scored in a standard proforma according to a five-point scale. The description of different responses and characteristics for each item are distributed horizontally over five columns. The column that represents the predominant behaviour of the infant for each item, is circled and scored according to the number of columns 1 to 5. Half-scores are appropriate if the infant's performance falls between the description of two columns (e.g., a score of 2.5 if the infant displays characteristics between that of columns 2 and 3). These scores are defined as RSs. The RSs are not linear and the '*optimal score*' for each of the 34 items depended on the frequency distribution of RSs per item for the original study population. For

example, for the posture item, a score of 1 to 2 would indicate decreased muscle tone, a score of 3 and 4 would be normal tone and a score of 5 would indicate increased muscle tone [30].

The RS for each item was converted to an ‘*optimality score*’, using the 5th and 10th centiles as cut-off points [30, 36]. Items falling above the 10th centile are given a score of 1 (*optimal*), between the 5th and 10th a score of 0.5 (*borderline*), and below the 5th centile, a score of 0 (*sub-optimal*). For the infants at 6- and 10-weeks post-term age in this study population, the same ‘*optimality scoring system*’ was applied to their individual RSs [30, 36].

**Compound Scores:** Compound scores were calculated for each of the 6 domains: *posture and tone, tone patterns, reflexes, spontaneous movements, abnormal neurological signs, and orientation and behaviour*. The compound optimality score for each domain is the sum of the optimality scores for the individual items in the particular domain. This score may range from 0 (if all the items in the compound are *sub-optimal*) to a maximum score equal to the number of items in the particular compound if every item in the domain is *optimal* with a score of 1 [30, 36].

**Total score:** The total optimality score for the whole examination is the sum of the optimality scores of the 34 individual items. This score may range from 0 (if all the items are *sub-optimal*) to a maximum of 34 (if all the items are *optimal*). The distribution of the compound scores and total optimality scores were described as *optimal* when they fell above the 10th centile, *borderline* between the 5th and 10th centile and *sub-optimal* below the 5th centile [30, 36].

## **Clinical Examination**

The environmental conditions in which the assessment was performed were controlled for noise, bright light, and temperature. Because the assessment elicited variable behavioural responses in the infants, it was performed with all infants in a baseline behavioural state 4 (quiet alert state) [50]. The assessment was also done halfway between feeds to ensure

comparable behaviour amongst infants as far as possible. The infants were examined on a flat wooden table with a thin mat for comfort but assuring a firm and comfortable surface for bony areas, e.g., the occiput during rolling of the head from side to side. After uncovering the infant (only the diaper was left on), the evaluation started with a short period (two minutes) of observing posture and spontaneous movement in the supine position. The HNNE physically challenges infants and therefore the characteristics of the items such as *posture and tone* of the head, trunk and limbs in supine, and the *quality and quantity of spontaneous movement* were assessed before physical and tactile input from the examiner that formed an essential part of the rest of the assessment.

To ensure optimal performance of the infant in a quiet state, the items for *eye appearance, auditory, visual orientation and alertness* in the *orientation and behaviour* domains were recorded following the assessment of *posture and spontaneous movement*. This sequence in performing the assessment enabled the examiner to successfully complete the assessment, noting the triggers in the infant's *irritability* and *crying* behaviour. The *Moro reflex* was administered at the end of the assessment as infants are often startled by their own response and may then be difficult to console. The assessment ended with the measurement of the infant's *head circumference*.

The findings for each item in the domains of *posture and tone, tone patterns, reflexes, spontaneous movements, abnormal neurological signs, and orientation and behaviour* were recorded during the examination. The duration of the assessment was between 10 - 15 minutes but depended on the infants' behavioural state and responses. The infants' *consolability* (strategies required to be consoled), the intensity of the *cry* and general *irritability* (response to

the handling and physical challenges of the examination) were assessed throughout the examination and were recorded last.

## Results

The bio-demographic data of the participating mother-infant pairs in this study are shown in Table 1. The infants resided in formal (60%) and informal settlements (40%) in the Tshwane District. The majority (60%) were delivered by Caesarean section and 40% were delivered through normal vaginal delivery. The mean gestational age- and sex-normalised z-scores for weight, length and head circumference were assessed at birth using the INTERGROWTH – 21st Newborn Size at Birth standard [55]. Age- and sex-normalised weight, length, head circumference and weight-for-length z-scores were assessed at 6 and 10 weeks using the WHO child growth standards [56]. The mean z-scores for infant anthropometry at birth, 6 and 10 weeks all lay between -1 and +1, indicating that the majority of the infants fell within the range for optimal growth (i.e. between the z-scores of -2 and +2). The average chronological ages at the follow-up assessments (i.e., mean time since birth) were 6.4 and 10.4 weeks, respectively. Twenty-five percent (25.7%) of mothers were HIV-infected, however, none of the infants in the study tested HIV positive.

**Table 1. Bio-demographic data of the mother-infant pairs in this study population.**

|                                                       | <b>Birth</b>  | <b>6-week visit</b> | <b>10-week visit</b> |
|-------------------------------------------------------|---------------|---------------------|----------------------|
|                                                       | <b>n = 35</b> | <b>n = 35</b>       | <b>n = 35</b>        |
| <b>Infant sex, M/F</b>                                | 19/16         | -                   | -                    |
| <b>Gestational age at birth*, w (Umbiflow™ value)</b> | 39.2 ± 1.4    | -                   | -                    |
| <b>Mode of delivery</b>                               | -             | -                   | -                    |
| <b>Normal vaginal delivery, n (%)</b>                 | 14 (40)       | -                   | -                    |
| <b>Caesarean section before labour, n (%)</b>         | 6 (17.1)      | -                   | -                    |
| <b>Caesarean section during labour, n (%)</b>         | 15 (42.9)     | -                   | -                    |
| <b>Apgar score at 5 minutes</b>                       | -             | -                   | -                    |
| <b>0 – 6, n (%)</b>                                   | 1 (2.9)       | -                   | -                    |
| <b>7 – 10, n (%)</b>                                  | 34 (97.1)     | -                   | -                    |
| <b>Foetal distress, n (%)</b>                         | 5 (14.3)      | -                   | -                    |
| <b>Chronological age at assessment*, w</b>            | -             | 6.4 ± 0.6           | 10.4 ± 0.6           |
| <b>Weight*, kg</b>                                    | 3.11 ± 0.6    | 4.9 ± 0.7           | 5.85 ± 0.8           |
| <b>Head circumference*, cm</b>                        | 34.7 ± 1.6    | 38.9 ± 1.4          | 40.5 ± 1.4           |
| <b>Length*, cm</b>                                    | 50.0 ± 3.0    | 54.8 ± 2.6          | 58.6 ± 2.8           |
| <b>Weight for age Z-score*</b>                        | 0.24 ± 0.26   | 0.09 ± 1.17         | 0.12 ± 1.16          |
| <b>Head circumference for age Z-score*</b>            | 0.85 ± 1.21   | 0.73 ± 1.24         | 0.98 ± 1.14          |
| <b>Length for age Z-score*</b>                        | 0.58 ± 1.60   | 0.74 ± 1.31         | - 0.27 ± 1.36        |
| <b>Weight for length Z-score*</b>                     | -             | 0.86 ± 1.33         | 0.61 ± 1.09          |
| <b>Mode of feeding</b>                                | -             | -                   | -                    |
| <b>Breast, n (%)</b>                                  | 27 (77.1)     | 26 (74,3)           | 24 (68,6)            |
| <b>Mixed, n (%)</b>                                   | 6 (17.1)      | 6 (17.1)            | 7 (20.0)             |
| <b>Bottle, n (%)</b>                                  | 2 (5.7)       | 3 (8.6)             | 4 (11.4)             |
| <b>Maternal age*, y</b>                               | 29.4 ± 5.7    | -                   | -                    |
| <b>Gravidity**</b>                                    | 2 (1 – 5)     | -                   | -                    |
| <b>Maternal HIV status positive, n (%)</b>            | 9 (25.7)      | -                   | -                    |
| <b>Description of neighbourhood</b>                   | -             | -                   | -                    |
| <b>Formal settlement, n (%)</b>                       | 21 (60)       | -                   | -                    |
| <b>Informal settlement, n (%)</b>                     | 14 (40)       | -                   | -                    |

\*Mean ± SD

\*\* Median (range)

**Abbreviations:** SD = standard deviation; M = male; F = female; w = weeks; y = years; kg = kilograms; cm = centimetres

## Clinical examination results

The 34 items of the HNNE proforma are illustrated in Figures 1 to 5, reflecting the 6 *compounds* of the examination [30, 36]. The distribution of RSs for all items at 6 and 10 weeks respectively and the percentage of infants who scored each RS are illustrated by a small table on the right side of every item (Figs. 1 – 5). The distribution of RSs was determined by the frequency in which the characteristics were displayed in the performance of the infant in each of the 34 items. The scores that were frequently obtained by infants in both age groups and that were considered *optimal* (above the 10th centile) by a score of 1 are indicated in the dark-grey areas. The light-grey columns indicate those RSs that were considered *borderline* (between the 5th – 10th centile) by a score of 0.5. The RSs that fell outside the grey areas are considered *sub-optimal* (below the 5th centile) and therefore scored 0.

Compound optimality (summation of individual item optimality scores) and the total optimality score (summation of the 34 individual item optimality scores) ranges, mean values, standard deviations and percentages for the whole population at 6- and 10-weeks postnatal age are shown in Table 2.

**Table 2: Compound and total optimality scores for healthy term infants at 6- and 10-weeks post-term age (n = 35)**

| <i>Compounds</i>                      | Age (w*) | Range     | Mean  | SD   | 5th  | 10th | 90th | 95th | Optimal score (%) |
|---------------------------------------|----------|-----------|-------|------|------|------|------|------|-------------------|
| <b>1. Posture &amp; tone</b>          | 6        | 8 – 10    | 9.67  | 0.58 | 8.7  | 9    | 10   | 10   | 97                |
|                                       | 10       | 8 – 10    | 9.71  | 0.52 | 8.7  | 9.2  | 10   | 10   | 94                |
| <b>2. Tone patterns</b>               | 6        | 4 – 5     | 4.87  | 0.31 | 4    | 4.5  | 5    | 5    | 97                |
|                                       | 10       | 4 – 5     | 4.97  | 0.17 | 5    | 5    | 5    | 5    | 97                |
| <b>3. Reflexes</b>                    | 6        | 3 – 6     | 5.64  | 0.72 | 4    | 4.7  | 6    | 6    | 86                |
|                                       | 10       | 3 – 6     | 5.80  | 0.62 | 4.7  | 5.5  | 6    | 6    | 94                |
| <b>4. Spontaneous movements</b>       | 6        | 1.5 – 3   | 2.87  | 0.35 | 2    | 2.5  | 3    | 3    | 94                |
|                                       | 10       | 1 – 3     | 2.83  | 0.51 | 1.7  | 2.4  | 3    | 3    | 86                |
| <b>5. Abnormal signs</b>              | 6        | 1 – 3     | 2.86  | 0.43 | 2    | 2.4  | 3    | 3    | 86                |
|                                       | 10       | 2 – 3     | 2.89  | 0.32 | 2    | 2.4  | 3    | 3    | 86                |
| <b>6. Orientation &amp; behaviour</b> | 6        | 3 – 7     | 6.54  | 1.09 | 3.7  | 5.4  | 7    | 7    | 86                |
|                                       | 10       | 5 – 7     | 6.74  | 0.51 | 5.9  | 6    | 7    | 7    | 100               |
| <b>Total</b>                          | 6        | 25.5 – 34 | 32.46 | 2.02 | 28.9 | 29.5 | 34   | 34   | 91                |
|                                       | 10       | 29 – 34   | 32.94 | 1.20 | 30.9 | 31.5 | 34   | 34   | 94                |

\*w = weeks postnatal age

## ***Posture and tone***

The frequency distribution of RSs in this domain was different for each of the 10 items at both 6 and 10 weeks (Fig. 1). Median score shifts of one and two columns to the left from 6 weeks to 10 weeks indicated characteristics of diminished flexion posture and lesser resistance of upper limbs to traction and passive extension respectively. Median score shifts of one to two columns involving flexor and extensor head control in sitting and extensor control in horizontal occurred to the right from 6 weeks to 10 weeks. The compound optimality scores for *posture and tone* ranged from 8 – 10 out of 10 at both 6 and 10 weeks. These scores were achieved by 97% of the total population of infants at the 6-week and 94% at the 10-week postnatal age. Scores of 8.5 and lower at both 6 and 10 weeks were considered sub-optimal (Table 2).

(Insert **Fig. 1** here. **Raw score distribution of *posture and tone* items.**)

**Figure 1.** Raw score distribution of *posture and tone* items. Scores that were frequently obtained by infants in each age group and considered optimal ( $\geq$  10th centile) by a score of 1, are indicated in the dark-grey areas in the small tables on the right of the HNNE proforma [30]. The light-grey columns indicate RSs considered borderline (5th – 10th centile) by a score of 0.5. Sub-optimal RSs ( $<$  5<sup>th</sup> centile) that fell outside the grey areas, scored 0. The cell with the highlighted border represents the median score. The same ‘*optimality scoring*’ principle applies to Figures 1 – 5 [30, 36].

## ***Tone patterns***

Scores in this domain of the HNNE were obtained by comparing the RSs of selected individual items of limb tone and head control patterns from the *tone and posture* compound (Fig. 2). At 6 weeks 97% of infants scored  $\geq$  4.5 out of 5 and at 10 weeks 97% scored 5 out of 5. The distribution and median scores at 6 and 10 weeks were consistent in all 5 items. (Table 2).

(Insert **Fig. 2** here. **Raw score distribution of *tone pattern* items.**)

**Figure 2.** Raw score distribution of *tone pattern* items. See score description under Fig.1.

### ***Reflexes***

Palmar grasp RSs at 10 weeks were more widely distributed and showed a median score shift of two columns to the left on the proforma examination form indicating a diminished reflex response towards 10 weeks (Fig. 3). The compound optimality score for *reflexes* ranged between 3 – 6 out of 6 in both the 6 and 10-week age groups. Scores from 5 to 6 were found in 86% of infants at 6 weeks and in 94% of infants at 10 weeks. (Table 2).

(Insert **Fig. 3** here. **Raw score distribution of *reflexes* items.**)

**Figure 3.** Raw score distribution of *reflex* items. See score description under Fig.1.

### ***Movements***

The *head in prone* item at 10 weeks displayed a wider distribution towards the right from the mutual median RS. This distribution is indicative of increasing postural extensor tone in horizontal. The compound optimality score for *movements* ranged from 1.5 to 3 out of 3 at 6 weeks and 1 to 3 out of 3 at 10 weeks (Fig. 4). The optimal score of  $\geq 2.5$  was achieved by 94% of infants at 6 weeks and 86% of infants at 10 weeks. (Table 2).

### ***Abnormal signs***

The median RS for tremors at 10 weeks shifted two columns towards the left from the 6-week median score, indicating lesser tremor behaviour. The median RS for startle behaviour at 10 weeks demonstrated a one column shift to the right from the 6-week median score (Fig. 4). The compound optimality scores for *abnormal signs* ranged between 1 and 3 out of 3 at 6 weeks



and 1.5 and 3 out of 3 at 10 weeks. A compound optimality score of 2.5 was achieved by 86% of the 6-week-old infants and a score of 2.5 by 86% of the 10-week-old infants (Table 2).

(Insert **Fig. 4** here. **Raw score distribution of *movements* and *abnormal signs* items.**)

**Figure 4.** Raw score distribution of *movement* and *abnormal signs* items. See score description under Fig.1.

### ***Orientation & behaviour***

For both items involving *visual orientation* and *alertness* at 10 weeks, the median RSs shifted to the right with two columns from the 6-week median score. The median RS for *consolability* at 10 weeks shifted one column to the left from the 6-week median score (Fig. 5). The compound optimality scores for *orientation and behaviour* ranged from 3 to 7 out of 7 at 6 weeks and from 5 to 7 out of 7 at 10 weeks (Fig. 6). Scores of 5 to 7 were found in 86% of infants at 6 weeks and scores of 6 and 7 in 100% of infants at 10 weeks (Table 2).

(Insert **Fig. 5** here. **Raw score distribution of *orientation and behaviour* items.**)

**Figure 5.** Raw score distribution of *orientation and behaviour* items. See score description under Fig.1.

### ***Total examination optimality score***

A total optimality score for the examination was obtained when the optimal scores of all 34 items were added up. In this study, the total optimality scores for infants at 6-weeks post-term age ranged between 25.5 and 34 out of the 34 items. The range for total optimality scores of infants at 10-weeks post-term age was 29 to 34 out of 34 items. In the 6-week age group, 91% of the infants obtained a total examination optimality score between 29 and 34. Scores  $\leq 28.5$

at 6 weeks were considered suboptimal. In the 10-week age group, 94% of the infants obtained total examination optimality scores between 31.5 and 34. A score  $\leq 30.5$  at 10 weeks was considered sub-optimal (Table 2).

## Discussion

Despite the progress in research, programmes and policies that promote the health and well-being of mothers and children, 66% of children younger than five (5) years in developing countries still risk failing to reach their developmental potential [16, 17]. Many maternal and foetal conditions are associated with adverse insults to the developing brain that cause altered brain structure and sub-optimal neurodevelopmental trajectories in the affected infant [1, 10, 13, 20].

Health care professionals are urgently called to identify at-risk infants but also contribute to sustainable early childhood intervention by addressing and thus potentially limiting the risk of adverse short- and long-term development outcomes in surviving and high-risk infants [16, 19, 22, 39]. The existing studies that examined the neurological status and developmental characteristics of newborn infants, published normative data with optimality scores for term and late preterm infants as well as preterm infants at term equivalent age [33-36].

Although these scores are very useful in a variety of settings, questions were raised about the validity of the original optimality scores of infants in settings other than developed countries [38-41, 52]. Guzzetta et al., (2005) are the only researchers that studied infants longitudinally in the same age groups that compare to our study. These authors' randomly studied 79 low-risk infants from birth to 10 weeks. The study provided useful guidelines for screening infants at 6 weeks, however, values such as optimality scores that can be used in well-baby clinics to identify infants at risk of developmental delay post-natal age were not provided due to the small

numbers of infants per post-natal age group. Their findings prompted us to use the HNNE in our longitudinal study and apply the '*optimality scoring system*' to a population of healthy infants aged 6- and 10 weeks in a developing country.

Our study assessed and documented the neuro-motor and neuro-behavioural characteristics that were displayed by 35 healthy term-born infants at the ages of 6 and 10 weeks during scheduled clinic visits in a developing country. The RSs obtained on the HNNE in this cohort of infants were converted to optimality scores by applying the HNNE optimality scoring system with cut-off points that resulted in quantitative estimation of each item on the evaluation form (Supplementary Tables S1 - 6) [36].

The results of this study are similar to the observations made by Guzetta et al., (2005) at 6 weeks and support 6 weeks as an important milestone in the neurodevelopmental behaviour in infants in the domains of *posture, limb/axial tone, and visual behaviour* [26]. Our study was able to quantify the results per 6- and 10- week post-natal age groups respectively due to higher numbers (n = 35) of participants per age group. Furthermore, the results of this study showed the direction of notable ongoing changes in *upper and lower limb tone, active head control* in horizontal and vertical positions, and advanced *visual orientation and alertness* in this cohort of infants as they developed towards 10 weeks. These changes in characteristics indicate that 10 weeks is another significant milestone in the neurodevelopmental process. This trajectory of development has not been described or reported in any of the consulted literature.

The results show different RS distributions for most items in the HNNE proforma in each of the two age groups, as well as different compound and total optimality score ranges respectively. The strength of the study lies in the longitudinal monitoring of the developmental trajectory of milestone characteristics between 6 and 10 weeks' post-term age in a cohort of

healthy infants in the Tshwane District of SA. These characteristics appear to be important changes that occur in healthy term infants across cultures and are therefore considered an important stepping stone for the early identification of neurodevelopmental risk factors in infants at 6 and 10 weeks.

## **Conclusion**

This study presents the first results of ongoing research and evolving data for identifying neuro-motor and neuro-behavioural characteristics of healthy term-born 6- and 10-week-old infants in a developing country. Studying bigger cohorts in SA may result in the collection of data that can be generalised and then incorporated into the RtHB. Quantifying the observation and grading of the characteristics of the infants' neuro-motor and neuro-behavioural responses at 6 and 10 weeks respectively, will enable health care professionals to red-flag infants at risk of neurodevelopmental pathology or delay. Such data will lead to a greater understanding, continuous monitoring and effective management of infants and as such contribute to achieving Child Health Sustainable Development Goals in SA.

## **Acknowledgements**

The authors pay tribute to the mothers and infants who took part in this study. Their contribution provides invaluable information for interpreting infant development in South Africa. Our gratitude is extended to the research team for their administrative role in the recruitment, anthropometry, and the collecting of background information. In her private capacity, the first author wishes to express a sincere appreciation toward the Department of Paediatrics and the University of Pretoria's Research Centre for Maternal, Foetal, Newborn

and Child Health Care Strategies at Kalafong Provincial Tertiary Hospital for the opportunity to participate in the UmbiBaby Study.

## Author contributions

**Conceptualization:** Marna Nel, Carina Eksteen, Ute Feucht

**Data curation:** Marna Nel, Helen Mulol

**Formal analysis:** Marna Nel, Helen Mulol

**Investigation:** Marna Nel

**Methodology:** Marna Nel, Carina Eksteen

**Project administration:** Marna Nel, Ute Feucht, Helen Mulol

**Resources:** Ute Feucht, Helen Mulol, Marna Nel

**Supervision:** Ute Feucht, Helen Mulol, Carina Eksteen

**Validation:** Ute Feucht, Marna Nel, Carina Eksteen

**Visualization:** Marna Nel, Carina Eksteen

**Writing – original draft:** Marna Nel

**Writing – review & editing:** Marna Nel, Ute Feucht, Helen Mulol, Carina Eksteen

## References

1. Lawn JE, Blencowe H, Waiswa P, Amouzou A, Mathers C, Hogan D, et al. Stillbirths: rates, risk factors, and acceleration towards 2030. *Lancet*. 2016;387(10018):587-603. DOI: [https://doi.org/10.1016/S0140-6736\(15\)00837-5](https://doi.org/10.1016/S0140-6736(15)00837-5)
2. Gardella B, Dominoni M, Caporali C, Cesari S, Fiandrino G, Longo S, et al. Placental features of fetal vascular malperfusion and infant neurodevelopmental outcomes at 2 years of age in severe fetal growth restriction. *Am J Obstet Gynecol*. 2021;225(4): 413.e1 - e11. DOI: <https://doi.org/10.1016/j.ajog.2021.03.037>
3. Gardosi J, Madurasinghe V, Williams M, Malik A, Francis A. Maternal and fetal risk factors for stillbirth: population based study. *BMJ*. 2013;346: f108. DOI: <https://doi.org/10.1136/bmj.f108>

4. Tann CJ, Nakakeeto M, Willey BA, Sewegaba M, Webb EL, Oke I, et al. Perinatal risk factors for neonatal encephalopathy: an unmatched case-control study. *Arch Dis Child Fetal Neonatal Ed.* 2018;103(3): F250-F6. DOI: [10.1136/archdischild-2017-312744](https://doi.org/10.1136/archdischild-2017-312744)
5. Lee AC, Katz J, Blencowe H, Cousens S, Kozuki N, Vogel JP, et al. National and regional estimates of term and preterm babies born small for gestational age in 138 low-income and middle-income countries in 2010. *Lancet Glob Health.* 2013;1(1): e26-36. DOI: [10.1016/S2214-109X\(13\)70006-8](https://doi.org/10.1016/S2214-109X(13)70006-8)
6. Katz J, Lee ACC, Kozuki N, Lawn JE, Cousens S, Blencowe H, et al. Mortality risk in preterm and small-for-gestational-age infants in low-income and middle-income countries: a pooled country analysis. *Lancet.* 2013;382(9890):417-25. DOI: [10.1016/S0140-6736\(13\)60993-9](https://doi.org/10.1016/S0140-6736(13)60993-9)
7. Nkosi S, Makin J, Hlongwane T, Pattinson RC. Screening and managing a low-risk pregnant population using continuous-wave Doppler ultrasound in a low-income population: a cohort analytical study. *S Afr Med J.* 2019;109(5):347. DOI: [10.7196/SAMJ.2019.v109i5.13611](https://doi.org/10.7196/SAMJ.2019.v109i5.13611)
8. Mwaniki MK, Atieno M, Lawn JE, Newton CRJC. Long-term neurodevelopmental outcomes after intrauterine and neonatal insults: a systematic review. *Lancet.* 2012;379(9814):445-52. DOI: [10.1016/S0140-6736\(11\)61577-8](https://doi.org/10.1016/S0140-6736(11)61577-8)
9. DiPietro JA, Kivlighan KT, Costigan KA, Rubin SE, Shiffler DE, Henderson JL, et al. Prenatal antecedents of newborn neurological maturation. *Child Dev.* 2010;81(1):115-30. DOI: [10.1111/j.1467-8624.2009.01384.x](https://doi.org/10.1111/j.1467-8624.2009.01384.x)
10. Starčević M, Predojević M, Butorac D, Tumbri J, Konjevoda P, Kadić AS. Early functional and morphological brain disturbances in late-onset intrauterine growth restriction. *Early Hum Dev.* 2016; 93:33-8. DOI: [10.1016/j.earlhumdev.2015.12.001](https://doi.org/10.1016/j.earlhumdev.2015.12.001)
11. Baschat AA, Viscardi RM, Hussey-Gardner B, Hashmi N, Harman C. Infant neurodevelopment following fetal growth restriction: relationship with antepartum surveillance parameters. *Ultrasound in Obstet Gynecol.* 2009;33(1):44-50. DOI: [10.1002/uog.6286](https://doi.org/10.1002/uog.6286)
12. Hartkopf J, Schleger F, Keune J, Wiechers C, Pauluschke-Froehlich J, Weiss M, et al. Impact of intrauterine growth restriction on cognitive and motor development at 2 years of age. *Front Physiol.* 2018; 9:1278. DOI: [10.3389/fphys.2018.01278](https://doi.org/10.3389/fphys.2018.01278)
13. Tolsa CB, Zimine S, Warfield SK, Freschi M, Rossignol AS, Lazeyras F, et al. Early alteration of structural and functional brain development in premature infants born with intrauterine growth restriction. *Pediatr Res.* 2004;56(1):132-8. DOI: [10.1203/01.PDR.0000128983.54614.7E](https://doi.org/10.1203/01.PDR.0000128983.54614.7E)
14. Tann CJ, Webb EL, Lassman R, Ssekya J, Sewegaba M, Musoke M, et al. Early childhood outcomes after neonatal encephalopathy in Uganda: a cohort study. *EclinicalMedicine.* 2018; 6:26-35. DOI: [10.1016/j.eclinm.2018.12.001](https://doi.org/10.1016/j.eclinm.2018.12.001)

15. Romeo DM, Ricci M, Picilli M, Foti B, Cordaro G, Mercuri E. Early neurological assessment and long-term neuromotor outcomes in late preterm infants: a critical review. *Medicina*. 2020;56(9):475. DOI: [10.3390/medicina56090475](https://doi.org/10.3390/medicina56090475)
16. Black MM, Walker SP, Fernald LCH, Andersen CT, DiGirolamo AM, Lu C, et al. Early childhood development coming of age: science through the life course. *Lancet*. 2017;389(10064):77-90. DOI: [10.1016/S0140-6736\(16\)31389-7](https://doi.org/10.1016/S0140-6736(16)31389-7)
17. Grantham-McGregor S, Cheung YB, Cueto S, Glewwe P, Richter L, Strupp B, et al. Developmental potential in the first 5 years for children in developing countries. *Lancet*. 2007;369(9555):60-70. DOI: [10.1016/S0140-6736\(07\)60032-4](https://doi.org/10.1016/S0140-6736(07)60032-4)
18. Blakstad MM, Smith ER, Etheredge A, Locks LM, McDonald CM, Kupka R, et al. Nutritional, socioeconomic, and delivery characteristics are associated with neurodevelopment in Tanzanian children. *J Pediatr*. 2019; 207:71-9. e8. DOI: [10.1016/j.jpeds.2018.10.066](https://doi.org/10.1016/j.jpeds.2018.10.066)
19. Colella M, Frérot A, Novais ARB, Baud O. Neonatal and long-term consequences of fetal growth restriction. *Curr Pediatr Rev*. 2018;14(4):212-8. DOI: [10.2174/1573396314666180712114531](https://doi.org/10.2174/1573396314666180712114531)
20. Cosmi E, Fanelli T, Visentin S, Trevisanuto D, Zanardo V. Consequences in infants that were intrauterine growth restricted. *J Pregnancy*. 2011; 2011:364381. DOI: [10.1155/2011/364381](https://doi.org/10.1155/2011/364381)
21. Hlongwane T, Cronje T, Nkosi B, Pattinson RC. The prevalence of abnormal Doppler's of the umbilical artery in a low-risk pregnant population in South Africa. *EClinicalMedicine*. 2021; 34:100792. DOI: [10.1016/j.eclinm.2021.100792](https://doi.org/10.1016/j.eclinm.2021.100792)
22. Richter LM, Daelmans B, Lombardi J, Heymann J, Boo FL, Behrman JR, et al. Investing in the foundation of sustainable development: pathways to scale up for early childhood development. *Lancet*. 2017;389(10064):103-18. DOI: [10.1016/S0140-6736\(16\)31698-1](https://doi.org/10.1016/S0140-6736(16)31698-1)
23. Tomlinson M, Darmstadt GL, Yousafzai AK, Daelmans B, Britto P, Gordon SL, et al. Global research priorities to accelerate programming to improve early childhood development in the sustainable development era: a CHNRI exercise. *J Glob Health*. 2019;9(3):020703. DOI: [10.7189/jogh.09.020703](https://doi.org/10.7189/jogh.09.020703)
24. Kuruvilla S, Bustreo F, Kuo T, Mishra CK, Taylor K, Fogstad H, et al. The Global strategy for women's, children's and adolescents' health (2016-2030): a roadmap based on evidence and country experience. *Bull World Health Organ*. 2016;94(5):398-400. DOI: [10.2471/BLT.16.170431](https://doi.org/10.2471/BLT.16.170431)
25. Novak I, Morgan C, Adde L, Blackman J, Boyd RN, Brunstrom-Hernandez J, et al. Early, accurate diagnosis and early intervention in cerebral palsy: advances in diagnosis and treatment. *JAMA Pediatr*. 2017;171(9):897-907. DOI: [10.1001/jamapediatrics.2017.1689](https://doi.org/10.1001/jamapediatrics.2017.1689)



26. Guzzetta A, Haataja L, Cowan F, Bassi L, Ricci D, Cioni G, et al. Neurological examination in healthy term infants aged 3-10 weeks. *Biol Neonate*. 2005;87(3):187-96. DOI: [10.1159/000082977](https://doi.org/10.1159/000082977)
27. Francis D. Minister Botha launches Road to Health Booklet. In: Health Document, editor. 2011. (06/062022) <https://www.gov.za/minister-botha-launches-road-health-booklet>; (06/06/2022) [https://www.westerncape.gov.za/assets/departments/health/rthb\\_booklet.pdf](https://www.westerncape.gov.za/assets/departments/health/rthb_booklet.pdf)
28. SA Government. Statistics SA 2022 (5/06/2022). Available from: <https://www.statssa.gov.za/>; <https://worldpopulationreview.com/countries/south-africa-population>
29. Naidoo H, Avenant T, Goga A. Completeness of the Road-to-Health Booklet and Road-to-Health Card: Results of cross-sectional surveillance at a provincial tertiary hospital. *S Afr J HIV Med*. 2018;19(1). DOI: [10.4102/sajhivmed.v19i1.765](https://doi.org/10.4102/sajhivmed.v19i1.765)
30. Dubowitz LMS, Dubowitz V, Mercuri E. *The Neurological Assessment of the Preterm and Full-term Newborn Infant*. Second ed. Bax MCO, editor: Mac Keith Press; 1999. 155 p. ISBN-13: 978-1898683155; ISBN-10: 1898683158
31. Dubowitz L, Ricci D, Mercuri E. The Dubowitz neurological examination of the full-term newborn. *Ment Retard Dev Disabil Res Rev*. 2005;11(1):52-60. DOI: [10.1002/mrdd.20048](https://doi.org/10.1002/mrdd.20048)
32. Venkata SKRG, Pournami F, Prabhakar J, Nandakumar A, Jain N. Disability Prediction by Early Hammersmith Neonatal Neurological Examination: a diagnostic study. *J Child Neurol*. 2020;35(11):731-6. DOI: [10.1177/0883073820930487](https://doi.org/10.1177/0883073820930487)
33. Mercuri E, Guzzetta A, Laroche S, Ricci D, van Haastert IL, Simpson A, et al. Neurologic examination of preterm infants at term age: comparison with term infants. *J Pediatr*. 2003;142(6):647-55. DOI: [10.1067/mpd.2003.215](https://doi.org/10.1067/mpd.2003.215)
34. Ricci D, Romeo DMM, Haataja L, van Haastert IC, Cesarini L, Maunu J, et al. Neurological examination of preterm infants at term equivalent age. *Early Hum Dev*. 2008;84(11):751-61. DOI: [10.1016/j.earlhumdev.2008.05.007](https://doi.org/10.1016/j.earlhumdev.2008.05.007)
35. Romeo DM, Luciano R, Corsello M, Ricci D, Brogna C, Zuppa A, et al. Neonatal neurological examination of late preterm babies. *Early Hum Dev*. 2013;89(8):537-45. DOI: [10.1016/j.earlhumdev.2013.01.002](https://doi.org/10.1016/j.earlhumdev.2013.01.002)
36. Dubowitz L, Mercuri E, Dubowitz V. An optimality score for the neurologic examination of the term newborn. *J Pediatr*. 1998;133(3):406-16. DOI: [10.1016/s0022-3476\(98\)70279-3](https://doi.org/10.1016/s0022-3476(98)70279-3)
37. Noble Y, Boyd R. Neonatal assessments for the preterm infant up to 4 months corrected age: a systematic review. *Dev Med Child Neurol*. 2012;54(2):129-39. DOI: [10.1111/j.1469-8749.2010.03903.x](https://doi.org/10.1111/j.1469-8749.2010.03903.x)



38. Hagmann CF, Chan D, Robertson NJ, Acolet D, Nyombi N, Nakakeeto M, et al. Neonatal neurological examination in well newborn term Ugandan infants. *Early Hum Dev.* 2015;91(12):739-49. DOI: [10.1016/j.earlhumdev.2015.08.005](https://doi.org/10.1016/j.earlhumdev.2015.08.005)
39. Lawford HLS, Nuamah MA, Liley HG, Lee AC, Botchway F, Kumar S, et al. Gestational Age-Specific Distribution of the Hammersmith Neonatal Neurological Examination Scores Among Low-Risk Neonates in Ghana. *Early Hum Dev.* 2021; 152:105133. DOI: [10.1016/j.earlhumdev.2020.105133](https://doi.org/10.1016/j.earlhumdev.2020.105133)
40. McGready R, Simpson J, Panyavudhikrai S, Loo S, Mercuri E, Haataja L, et al. Neonatal neurological testing in resource-poor settings. *Ann Trop Paediatr.* 2000;20(4):323-36. DOI: [10.1080/02724936.2000.11748154](https://doi.org/10.1080/02724936.2000.11748154)
41. Hieu NT, Gainsborough M, Simpson JA, Thuy NT, Hang NN, Taylor AM, et al. Neurological status of low-risk Vietnamese newborns: a comparison with a British newborn cohort. *J Health Popul Nutr.* 2006;24(1):57-63. DOI:[10.3329/JHPN.V24I1.747](https://doi.org/10.3329/JHPN.V24I1.747)
42. Lawford HLS, Nuamah MA, Liley HG, Griffin A, Lekpor CE, Botchway F, et al. Associations between malaria in pregnancy and neonatal neurological outcomes. *Int J Infect Dis.* 2021; 112:144-51. DOI: [10.1016/j.ijid.2021.07.037](https://doi.org/10.1016/j.ijid.2021.07.037)
43. Tuiskula A, Metsäranta M, Toiviainen-Salo S, Vanhatalo S, Haataja L. Profile of minor neurological findings after perinatal asphyxia. *Acta Paediatr.* 2022;111(2):291-9. DOI: [10.1111/apa.16133](https://doi.org/10.1111/apa.16133)
44. Tuhkanen H, Pajulo M, Jussila H, Ekholm E. Infants born to women with substance use: Exploring early neurobehavior with the Dubowitz neurological examination. *Early Hum Dev.* 2019; 130:51-6. DOI: [10.1016/j.earlhumdev.2018.12.019](https://doi.org/10.1016/j.earlhumdev.2018.12.019)
45. Ricci D, Guzzetta A, Cowan F, Haataja L, Rutherford M, Dubowitz L, et al. Sequential neurological examinations in infants with neonatal encephalopathy and low apgar scores: relationship with brain MRI. *Neuropediatrics.* 2006;37(3):148-53. DOI: [10.1055/s-2006-924333](https://doi.org/10.1055/s-2006-924333)
46. Lawford HLS, Nuamah MA, Liley HG, Lee AC, Kumar S, Adjei AA, et al. Neonatal neurological examination in a resource-limited setting: What defines normal? *Eur J Paediatr Neurol.* 2020; 29:71-80. DOI: [10.1016/j.ejpn.2020.08.010](https://doi.org/10.1016/j.ejpn.2020.08.010)
47. Committee TNMG. Guidelines for maternity care in South Africa - A manual for clinics, community health centres and district hospitals: SA Department of Health; 2016 (5/06/2022). 4th Edition: <https://www.idealhealthfacility.org.za/App/Document/Download/42>
48. Umbiflow. (6/06/2022) <https://www.up.ac.za/media/shared/717/Umbiflow/csir-umbiflowdevice.zp216494.pdf>; (6/06/2022) <https://www.up.ac.za/media/shared/717/Umbiflow/umbiflow-brochure.zp216495.pdf>
49. Theron GB, Theron AM, Odendaal HJ, Bunn AE. Comparison between a newly developed PC-based Doppler umbilical artery waveform analyser and a commercial unit. *S Afr Med J.* 2005;95(1):62-4. <http://www.samj.org.za/index.php/samj/article/view/1526/903>

50. Brazelton TB, Nugent KJ. Neonatal Behavioral Assessment Scale. 3rd Edition: Mac Keith Press; 1995. ISBN: 0 898683 05 0
51. Dubowitz LM, Dubowitz V, Palmer P, Verghote M. A new approach to the neurological assessment of the preterm and full-term newborn infant. *Brain Dev.* 1980;2(1):3-14. DOI: [10.1016/s0387-7604\(80\)80003-9](https://doi.org/10.1016/s0387-7604(80)80003-9)
52. Spittle AJ, Walsh J, Olsen JE, McInnes E, Eeles AL, Brown NC, et al. Neurobehaviour and neurological development in the first month after birth for infants born between 32-42 weeks' gestation. *Early Hum Dev.* 2016; 96:7-14. DOI: [10.1016/j.earlhumdev.2016.02.006](https://doi.org/10.1016/j.earlhumdev.2016.02.006)
53. Eeles AL, Olsen JE, Walsh JM, McInnes EK, Molesworth CM, Cheong JL, et al. Reliability of neurobehavioral assessments from birth to term equivalent age in preterm and term born infants. *Phys Occup Ther in Pediatr.* 2017;37(1):108-19. DOI: [10.3109/01942638.2015.1135845](https://doi.org/10.3109/01942638.2015.1135845)
54. Hammersmith NE. Hammersmith Neurological Examinations: WordPress; (5/06/2022). Available from: <http://hammersmith-neuro-exam.com/>
55. Villar J, Giuliani F, Figueras-Aloy J, Barros F, Bertino E, Bhutta ZA, et al. Growth of preterm infants at the time of global obesity. *Arch Dis Child.* 2019;104(8):725-7. DOI: [10.1136/archdischild-2018-315006](https://doi.org/10.1136/archdischild-2018-315006)
56. De Onis M, Onyango AW, Borghi E, Garza C, Yang H. Comparison of the World Health Organization (WHO) Child Growth Standards and the National Center for Health Statistics/WHO international growth reference: implications for child health programmes. *Public Health Nutr.* 2006;9(7):942-7. DOI: [10.1017/phn20062005](https://doi.org/10.1017/phn20062005)

## Supporting information

**S1 Table. Conversion of raw scores into optimality scores for items assessing *posture and tone*.**

(DOCX)

**S2 Table. Conversion of raw scores into optimality scores for *tone patterns*.**

(DOCX)

**S3 Table. Conversion of raw scores into optimality scores for items assessing *reflexes*.**

(DOCX)

**S4 Table. Conversion of raw scores into optimality scores for items assessing *movements*.**

(DOCX)

**S5 Table. Conversion of raw scores into optimality scores for items assessing *abnormal signs*.**

(DOCX)

**S6 Table. Conversion of raw scores into optimality scores for items assessing *orientation and behaviour*.**

(DOCX)

# Posture and tone

|         | column 1                                                                                                 | column 2                                                                                                  | column 3                                                                                                              | column 4                                                                                                                     | column 5                                                                                                                  |
|---------|----------------------------------------------------------------------------------------------------------|-----------------------------------------------------------------------------------------------------------|-----------------------------------------------------------------------------------------------------------------------|------------------------------------------------------------------------------------------------------------------------------|---------------------------------------------------------------------------------------------------------------------------|
| Posture | Arms & legs extended<br> | Legs slightly flexed<br> | Leg well-flexed but not adducted<br> | Leg well flexed & adducted near abdomen<br> | Abnormal posture: a) opisthotonus b)<br> |

|            |                                                                                                      |                                                                                                                                   |                                                                                                                      |                                                                                                                       |                                                                                                                                     |
|------------|------------------------------------------------------------------------------------------------------|-----------------------------------------------------------------------------------------------------------------------------------|----------------------------------------------------------------------------------------------------------------------|-----------------------------------------------------------------------------------------------------------------------|-------------------------------------------------------------------------------------------------------------------------------------|
| Arm recoil | Arms do not flex<br> | Arms flex slowly; not always; not completely<br> | Arms flex slowly; more complete<br> | Arms flex quickly and completely<br> | Arms difficult to extend; snap back forcefully<br> |
|------------|------------------------------------------------------------------------------------------------------|-----------------------------------------------------------------------------------------------------------------------------------|----------------------------------------------------------------------------------------------------------------------|-----------------------------------------------------------------------------------------------------------------------|-------------------------------------------------------------------------------------------------------------------------------------|

|              |                                                                                                                         |                                                                                                                                 |                                                                                                                                          |                                                                                                                                                |                                                                                                                                           |
|--------------|-------------------------------------------------------------------------------------------------------------------------|---------------------------------------------------------------------------------------------------------------------------------|------------------------------------------------------------------------------------------------------------------------------------------|------------------------------------------------------------------------------------------------------------------------------------------------|-------------------------------------------------------------------------------------------------------------------------------------------|
| Arm traction | Arms remain straight; no resistance<br> | Arms flex slightly or some resistance felt<br> | Arms flex well till shoulder lifts, then straighten<br> | Arms flex well approx 100° & maintained as shoulder lifts<br> | Flexion of arms <100°; maintained when body lifts up<br> |
|--------------|-------------------------------------------------------------------------------------------------------------------------|---------------------------------------------------------------------------------------------------------------------------------|------------------------------------------------------------------------------------------------------------------------------------------|------------------------------------------------------------------------------------------------------------------------------------------------|-------------------------------------------------------------------------------------------------------------------------------------------|

|            |                                                                                                |                                                                                                                         |                                                                                                                |                                                                                                            |                                                                                                                                     |
|------------|------------------------------------------------------------------------------------------------|-------------------------------------------------------------------------------------------------------------------------|----------------------------------------------------------------------------------------------------------------|------------------------------------------------------------------------------------------------------------|-------------------------------------------------------------------------------------------------------------------------------------|
| Leg recoil | No flexion<br> | Incomplete flexion; not every time<br> | Complete but slow flexion<br> | Complete fast flexion<br> | Legs difficult to extend; snap back forcefully<br> |
|------------|------------------------------------------------------------------------------------------------|-------------------------------------------------------------------------------------------------------------------------|----------------------------------------------------------------------------------------------------------------|------------------------------------------------------------------------------------------------------------|-------------------------------------------------------------------------------------------------------------------------------------|

|              |                                                                                                                   |                                                                                                                                 |                                                                                                                          |                                                                                                                                         |                                                                                                                          |
|--------------|-------------------------------------------------------------------------------------------------------------------|---------------------------------------------------------------------------------------------------------------------------------|--------------------------------------------------------------------------------------------------------------------------|-----------------------------------------------------------------------------------------------------------------------------------------|--------------------------------------------------------------------------------------------------------------------------|
| Leg traction | Legs straight - no resistance<br> | Legs flex slightly or some resistance felt<br> | Legs flex well till bottom lifts up<br> | Knee flexes -well; remains flexed when bottom up ↑<br> | Flexion stays when back-bottom up ↑<br> |
|--------------|-------------------------------------------------------------------------------------------------------------------|---------------------------------------------------------------------------------------------------------------------------------|--------------------------------------------------------------------------------------------------------------------------|-----------------------------------------------------------------------------------------------------------------------------------------|--------------------------------------------------------------------------------------------------------------------------|

|                 |                                                                                          |                                                                                             |                                                                                             |                                                                                            |                                                                                           |
|-----------------|------------------------------------------------------------------------------------------|---------------------------------------------------------------------------------------------|---------------------------------------------------------------------------------------------|--------------------------------------------------------------------------------------------|-------------------------------------------------------------------------------------------|
| Popliteal angle | <br>180° | <br>≈ 150° | <br>≈ 110° | <br>≈ 90° | <br><90° |
|-----------------|------------------------------------------------------------------------------------------|---------------------------------------------------------------------------------------------|---------------------------------------------------------------------------------------------|--------------------------------------------------------------------------------------------|-------------------------------------------------------------------------------------------|

|                |                                                                                                              |                                                                                                                                 |                                                                                                                            |                                                                                                                                  |  |
|----------------|--------------------------------------------------------------------------------------------------------------|---------------------------------------------------------------------------------------------------------------------------------|----------------------------------------------------------------------------------------------------------------------------|----------------------------------------------------------------------------------------------------------------------------------|--|
| Head control 1 | No attempt to raise head<br> | Infant tries: effort better felt than seen<br> | Raises head but drops forward or back<br> | Raises head: remains vertical it may wobble<br> |  |
|----------------|--------------------------------------------------------------------------------------------------------------|---------------------------------------------------------------------------------------------------------------------------------|----------------------------------------------------------------------------------------------------------------------------|----------------------------------------------------------------------------------------------------------------------------------|--|

|                |                                                                                                                |                                                                                                                                   |                                                                                                                              |                                                                                                                                    |                                                                                                                                             |
|----------------|----------------------------------------------------------------------------------------------------------------|-----------------------------------------------------------------------------------------------------------------------------------|------------------------------------------------------------------------------------------------------------------------------|------------------------------------------------------------------------------------------------------------------------------------|---------------------------------------------------------------------------------------------------------------------------------------------|
| Head control 2 | No attempt to raise head<br> | Infant tries: effort better felt than seen<br> | Raises head but drops forward or back<br> | Raises head: remains vertical it may wobble<br> | Head upright or extended; cannot be passively flexed<br> |
|----------------|----------------------------------------------------------------------------------------------------------------|-----------------------------------------------------------------------------------------------------------------------------------|------------------------------------------------------------------------------------------------------------------------------|------------------------------------------------------------------------------------------------------------------------------------|---------------------------------------------------------------------------------------------------------------------------------------------|

|          |                                                                                                               |                                                                                                                             |                                                                                                                   |                                                                                                                     |                                                                                                              |
|----------|---------------------------------------------------------------------------------------------------------------|-----------------------------------------------------------------------------------------------------------------------------|-------------------------------------------------------------------------------------------------------------------|---------------------------------------------------------------------------------------------------------------------|--------------------------------------------------------------------------------------------------------------|
| Head lag | Head drops & stays back<br> | Tries to lift head but it drops back<br> | Able to lift head slightly<br> | Lifts head in line with body<br> | Head in front of body<br> |
|----------|---------------------------------------------------------------------------------------------------------------|-----------------------------------------------------------------------------------------------------------------------------|-------------------------------------------------------------------------------------------------------------------|---------------------------------------------------------------------------------------------------------------------|--------------------------------------------------------------------------------------------------------------|

|               |                                                                                                                               |                                                                                                                                   |                                                                                                                           |                                                                                                                                  |                                                                                                                       |
|---------------|-------------------------------------------------------------------------------------------------------------------------------|-----------------------------------------------------------------------------------------------------------------------------------|---------------------------------------------------------------------------------------------------------------------------|----------------------------------------------------------------------------------------------------------------------------------|-----------------------------------------------------------------------------------------------------------------------|
| Ventral sweep | Back curved, head & limbs hang straight<br> | Back curved, head ↓, limbs slightly flexed<br> | Back slightly curved, limbs flexed<br> | Back straight, head in line, limbs flexed<br> | Back straight, head above body<br> |
|---------------|-------------------------------------------------------------------------------------------------------------------------------|-----------------------------------------------------------------------------------------------------------------------------------|---------------------------------------------------------------------------------------------------------------------------|----------------------------------------------------------------------------------------------------------------------------------|-----------------------------------------------------------------------------------------------------------------------|

|          |    |          |    |          |    |          |    |          |     |
|----------|----|----------|----|----------|----|----------|----|----------|-----|
| <b>1</b> | .5 | <b>2</b> | .5 | <b>3</b> | .5 | <b>4</b> | .5 | <b>5</b> |     |
| 0        | 0  | 3        | 20 | 63       | 3  | 11       | 0  | 0        | 6w  |
| 0        | 0  | 14       | 43 | 43       | 0  | 0        | 0  | 0        | 10w |

|   |   |    |   |    |   |   |   |   |     |
|---|---|----|---|----|---|---|---|---|-----|
| 0 | 0 | 34 | 0 | 66 | 0 | 0 | 0 | 0 | 6w  |
| 0 | 0 | 54 | 3 | 43 | 0 | 0 | 0 | 0 | 10w |

|   |   |    |   |    |   |   |   |   |     |
|---|---|----|---|----|---|---|---|---|-----|
| 0 | 0 | 3  | 0 | 94 | 0 | 3 | 0 | 0 | 6w  |
| 0 | 0 | 11 | 3 | 83 | 0 | 3 | 0 | 0 | 10w |

|   |   |    |   |    |   |    |   |   |     |
|---|---|----|---|----|---|----|---|---|-----|
| 0 | 0 | 49 | 3 | 37 | 0 | 11 | 0 | 0 | 6w  |
| 0 | 0 | 80 | 3 | 17 | 0 | 0  | 0 | 0 | 10w |

|   |   |   |   |    |   |    |   |   |     |
|---|---|---|---|----|---|----|---|---|-----|
| 0 | 0 | 0 | 0 | 74 | 0 | 26 | 0 | 0 | 6w  |
| 0 | 0 | 6 | 0 | 66 | 6 | 23 | 0 | 0 | 10w |

|   |   |    |    |    |   |    |   |   |     |
|---|---|----|----|----|---|----|---|---|-----|
| 0 | 0 | 0  | 6  | 46 | 6 | 43 | 0 | 0 | 6w  |
| 0 | 0 | 11 | 11 | 40 | 6 | 31 | 0 | 0 | 10w |

|   |   |   |   |    |   |    |   |   |     |
|---|---|---|---|----|---|----|---|---|-----|
| 0 | 0 | 3 | 0 | 83 | 3 | 11 | 0 | 0 | 6w  |
| 0 | 0 | 0 | 0 | 23 | 3 | 74 | 0 | 0 | 10w |

|   |   |   |   |    |   |    |   |   |     |
|---|---|---|---|----|---|----|---|---|-----|
| 0 | 0 | 6 | 3 | 77 | 3 | 11 | 0 | 0 | 6w  |
| 0 | 0 | 0 | 0 | 20 | 3 | 77 | 0 | 0 | 10w |

|   |   |    |   |    |    |    |   |   |     |
|---|---|----|---|----|----|----|---|---|-----|
| 0 | 0 | 23 | 0 | 49 | 23 | 5  | 0 | 0 | 6w  |
| 0 | 0 | 3  | 0 | 52 | 31 | 14 | 0 | 0 | 10w |

|   |   |    |   |    |    |    |   |   |     |
|---|---|----|---|----|----|----|---|---|-----|
| 0 | 0 | 26 | 9 | 51 | 9  | 6  | 0 | 0 | 6w  |
| 0 | 0 | 11 | 6 | 26 | 23 | 31 | 0 | 3 | 10w |

# Tone patterns

|               |                                | column 2                  | column 3                  | column 4                                               | column 5                                                 |
|---------------|--------------------------------|---------------------------|---------------------------|--------------------------------------------------------|----------------------------------------------------------|
| Flexor tone 1 | <b>On arm and leg traction</b> | Arm flexion < leg flexion | Arm flexion = leg flexion | Arm flexion > leg flexion but difference 1 column or < | Arm flexion > leg flexion and difference > than 1 column |

| 1 | .5 | 2  | .5 | 3  | .5 | 4 | .5 | 5 |     |
|---|----|----|----|----|----|---|----|---|-----|
| 0 | 0  | 29 | 0  | 69 | 0  | 2 | 0  | 0 | 6w  |
| 0 | 0  | 37 | 0  | 60 | 0  | 3 | 0  | 0 | 10w |

|               |                  |  |                                |                                                                                                                                                |                                                                                                                                              |
|---------------|------------------|--|--------------------------------|------------------------------------------------------------------------------------------------------------------------------------------------|----------------------------------------------------------------------------------------------------------------------------------------------|
| Flexor tone 2 | <b>In supine</b> |  | Arms and legs generally flexed | Strong arm flexion with strong leg extension intermittent<br> | Strong arm flexion with strong leg extension continuous<br> |
|---------------|------------------|--|--------------------------------|------------------------------------------------------------------------------------------------------------------------------------------------|----------------------------------------------------------------------------------------------------------------------------------------------|

|   |   |   |   |     |   |   |   |   |     |
|---|---|---|---|-----|---|---|---|---|-----|
| 0 | 0 | 3 | 0 | 94  | 0 | 3 | 0 | 0 | 6w  |
| 0 | 0 | 0 | 0 | 100 | 0 | 0 | 0 | 0 | 10w |

|               |                                   |                                     |                                |                                                          |                                                               |
|---------------|-----------------------------------|-------------------------------------|--------------------------------|----------------------------------------------------------|---------------------------------------------------------------|
| Leg ext. tone | <b>Leg traction vs pop. angle</b> | Leg traction > than popliteal angle | Leg traction = popliteal angle | Leg traction < popliteal angle but difference 1 column < | Leg traction < popliteal angle and difference > than 1 column |
|---------------|-----------------------------------|-------------------------------------|--------------------------------|----------------------------------------------------------|---------------------------------------------------------------|

|   |   |    |   |    |   |    |   |   |     |
|---|---|----|---|----|---|----|---|---|-----|
| 0 | 0 | 20 | 0 | 54 | 0 | 26 | 0 | 0 | 6w  |
| 0 | 0 | 29 | 0 | 54 | 0 | 17 | 0 | 0 | 10w |

|                |                                        |                               |                               |                                                          |                                                              |
|----------------|----------------------------------------|-------------------------------|-------------------------------|----------------------------------------------------------|--------------------------------------------------------------|
| Neck ext. tone | <b>Neck in ext. vs neck in flexion</b> | Head extension < head flexion | Head extension = head flexion | Head extension > head flexion, but difference 1 column < | Head extension > head flexion and difference > than 1 column |
|----------------|----------------------------------------|-------------------------------|-------------------------------|----------------------------------------------------------|--------------------------------------------------------------|

|   |   |   |   |    |   |   |   |   |     |
|---|---|---|---|----|---|---|---|---|-----|
| 0 | 0 | 3 | 0 | 88 | 0 | 9 | 0 | 0 | 6w  |
| 0 | 0 | 3 | 0 | 97 | 0 | 0 | 0 | 0 | 10w |

|                |                              |                               |                               |                                                       |                                                            |
|----------------|------------------------------|-------------------------------|-------------------------------|-------------------------------------------------------|------------------------------------------------------------|
| Inc. ext. tone | <b>Vent susp vs head lag</b> | Ventral suspension < head lag | Ventral suspension = head lag | Ventr suspension > head lag but difference 1 column < | Ventr suspension > head lag and difference > than 1 column |
|----------------|------------------------------|-------------------------------|-------------------------------|-------------------------------------------------------|------------------------------------------------------------|

|   |   |    |   |    |   |    |   |   |     |
|---|---|----|---|----|---|----|---|---|-----|
| 0 | 0 | 37 | 0 | 43 | 0 | 17 | 0 | 3 | 6w  |
| 0 | 0 | 34 | 0 | 26 | 0 | 40 | 0 | 0 | 10w |

# Reflexes

|        | column 1 | column 2       | column 3 | column 4    | column 5 |
|--------|----------|----------------|----------|-------------|----------|
| Tendon | Absent   | Felt, not seen | Seen     | Exaggerated | Clonus   |

|          |                  |                          |                   |                                          |                              |
|----------|------------------|--------------------------|-------------------|------------------------------------------|------------------------------|
| Suck/Gag | No gag / no suck | Weak irregular suck only | Weak regular suck | Strong suck:<br>• irregular<br>• regular | No suck but strong clenching |
|          |                  | No stripping             | Some stripping    | Good stripping                           |                              |

|              |             |                                |                           |                                   |                                                   |
|--------------|-------------|--------------------------------|---------------------------|-----------------------------------|---------------------------------------------------|
| Palmar grasp | No response | Short, weak flexion of fingers | Strong flexion of fingers | Strong finger flexion, shoulder ↑ | Very strong grasp; infant can be lifted off couch |
|--------------|-------------|--------------------------------|---------------------------|-----------------------------------|---------------------------------------------------|

|               |             |                                 |                                         |  |  |
|---------------|-------------|---------------------------------|-----------------------------------------|--|--|
| Plantar grasp | No response | Partial plantar flexion of toes | Toes curve around the examiner's finger |  |  |
|---------------|-------------|---------------------------------|-----------------------------------------|--|--|

|         |             |                            |                                                                           |  |  |
|---------|-------------|----------------------------|---------------------------------------------------------------------------|--|--|
| Placing | No response | Dorsiflexion of ankle only | Full placing response with flexion of hip, knee & placing sole on surface |  |  |
|---------|-------------|----------------------------|---------------------------------------------------------------------------|--|--|

|             |                                      |                                                                                    |                                                                                    |                                                                                    |                                                                                                             |
|-------------|--------------------------------------|------------------------------------------------------------------------------------|------------------------------------------------------------------------------------|------------------------------------------------------------------------------------|-------------------------------------------------------------------------------------------------------------|
| Moro reflex | No response or opening of hands only | Full abduction at shoulder and extension of the arms; no adduction                 | Full abduction but only delayed or partial adduction                               | Partial abduction at shoulder and arm extension followed by smooth adduction       | -No abduction or adduction;<br>-Only forward extension of arms from the shoulders<br>-Marked adduction only |
|             |                                      |  |  |  |                                                                                                             |

|   |    |   |    |     |    |   |    |   |     |
|---|----|---|----|-----|----|---|----|---|-----|
| 1 | .5 | 2 | .5 | 3   | .5 | 4 | .5 | 5 |     |
| 0 | 0  | 3 | 3  | 91  | 0  | 3 | 0  | 0 | 6w  |
| 0 | 0  | 0 | 0  | 100 | 0  | 0 | 0  | 0 | 10w |

|   |   |   |   |   |   |     |   |   |     |
|---|---|---|---|---|---|-----|---|---|-----|
| 0 | 0 | 0 | 0 | 0 | 0 | 100 | 0 | 0 | 6w  |
| 0 | 0 | 0 | 0 | 0 | 0 | 100 | 0 | 0 | 10w |

|   |   |    |   |    |   |    |   |   |     |
|---|---|----|---|----|---|----|---|---|-----|
| 0 | 0 | 6  | 0 | 40 | 0 | 54 | 0 | 0 | 6w  |
| 0 | 0 | 26 | 3 | 37 | 0 | 34 | 0 | 0 | 10w |

|   |   |   |   |    |   |   |   |   |     |
|---|---|---|---|----|---|---|---|---|-----|
| 0 | 0 | 3 | 0 | 97 | 0 | 0 | 0 | 0 | 6w  |
| 0 | 0 | 3 | 0 | 97 | 0 | 0 | 0 | 0 | 10w |

|   |   |   |   |    |   |   |   |   |     |
|---|---|---|---|----|---|---|---|---|-----|
| 6 | 0 | 0 | 3 | 91 | 0 | 0 | 0 | 0 | 6w  |
| 0 | 3 | 3 | 3 | 91 | 0 | 0 | 0 | 0 | 10w |

|   |   |    |   |    |   |    |   |   |     |
|---|---|----|---|----|---|----|---|---|-----|
| 0 | 0 | 11 | 0 | 54 | 3 | 26 | 0 | 6 | 6w  |
| 0 | 3 | 31 | 0 | 49 | 3 | 11 | 0 | 3 | 10w |

## Movements

|                     | column 1    | column 2                              | column 3                    | column 4                       | column 5                         |
|---------------------|-------------|---------------------------------------|-----------------------------|--------------------------------|----------------------------------|
| Movement (Quantity) | No movement | Sporadic and short isolated movements | Frequent isolated movements | Frequent generalised movements | Continuous exaggerated movements |

| 1 | .5 | 2 | .5 | 3 | .5 | 4  | .5 | 5 |     |
|---|----|---|----|---|----|----|----|---|-----|
| 0 | 0  | 0 | 0  | 9 | 0  | 91 | 0  | 0 | 6w  |
| 0 | 0  | 0 | 0  | 0 | 0  | 94 | 3  | 3 | 10w |

|                    |                 |                                                                |                                 |                                                               |                                                        |
|--------------------|-----------------|----------------------------------------------------------------|---------------------------------|---------------------------------------------------------------|--------------------------------------------------------|
| Movement (Quality) | Only stretches. | Frequent stretches and abrupt movements; some smooth movements | Fluent movements but monotonous | Fluent alternating movements of arms + legs; good variability | Cramped synchronised; mouthing jerky or other abn.mov. |
|--------------------|-----------------|----------------------------------------------------------------|---------------------------------|---------------------------------------------------------------|--------------------------------------------------------|

|   |   |   |   |    |   |    |   |   |     |
|---|---|---|---|----|---|----|---|---|-----|
| 0 | 0 | 3 | 0 | 17 | 3 | 77 | 0 | 0 | 6w  |
| 0 | 0 | 6 | 0 | 17 | 3 | 69 | 3 | 3 | 10w |

|                    |             |                                         |                                     |                                |                                       |
|--------------------|-------------|-----------------------------------------|-------------------------------------|--------------------------------|---------------------------------------|
| Head raising prone | No response | Infant rolls head over, chin not raised | Infant rolls head over, raises chin | Infant brings head and chin up | Infant brings head up and keeps it up |
|--------------------|-------------|-----------------------------------------|-------------------------------------|--------------------------------|---------------------------------------|

|   |   |    |   |    |   |    |   |    |     |
|---|---|----|---|----|---|----|---|----|-----|
| 0 | 0 | 20 | 0 | 74 | 3 | 3  | 0 | 0  | 6w  |
| 0 | 0 | 6  | 0 | 49 | 3 | 29 | 0 | 14 | 10w |

## Abnormal signs

|                          | column 1 | column 2                                   | column 3                                | column 4                                                                      | column 5                                            |
|--------------------------|----------|--------------------------------------------|-----------------------------------------|-------------------------------------------------------------------------------|-----------------------------------------------------|
| Abn. hand or toe posture |          | Hands open, toes straight most of the time | Intermittent fisting or thumb adduction | Continuous fisting or thumb adduction; index finger flexion, thumb opposition | Continuous big toe extension or flexion of all toes |

| 1 | .5 | 2  | .5 | 3  | .5 | 4 | .5 | 5 |     |
|---|----|----|----|----|----|---|----|---|-----|
| 0 | 0  | 6  | 0  | 94 | 0  | 0 | 0  | 0 | 6w  |
| 0 | 0  | 29 | 3  | 63 | 0  | 6 | 0  | 0 | 10w |

|        |  |                                      |                                                   |                             |                    |
|--------|--|--------------------------------------|---------------------------------------------------|-----------------------------|--------------------|
| Tremor |  | No tremor or tremor only when crying | Tremor only after Moro or occasionally when awake | Frequent tremors when awake | Continuous tremors |
|--------|--|--------------------------------------|---------------------------------------------------|-----------------------------|--------------------|

|   |   |    |   |    |   |   |   |   |     |
|---|---|----|---|----|---|---|---|---|-----|
| 0 | 0 | 46 | 3 | 46 | 0 | 6 | 0 | 0 | 6w  |
| 0 | 0 | 63 | 0 | 31 | 0 | 6 | 0 | 0 | 10w |

|         |                                  |                                                   |                          |                                  |                     |
|---------|----------------------------------|---------------------------------------------------|--------------------------|----------------------------------|---------------------|
| Startle | No startle, even to sudden noise | No spontaneous startle but reacts to sudden noise | 2-3 spontaneous startles | More than 3 spontaneous startles | Continuous startles |
|---------|----------------------------------|---------------------------------------------------|--------------------------|----------------------------------|---------------------|

|   |   |    |   |    |   |    |   |   |     |
|---|---|----|---|----|---|----|---|---|-----|
| 0 | 3 | 71 | 0 | 23 | 0 | 3  | 0 | 0 | 6w  |
| 0 | 0 | 51 | 3 | 34 | 0 | 11 | 0 | 0 | 10w |

# Orientation and behaviour

|               | column 1           | column 2 | column 3                      | column 4                                                                   | column 5                                                                           |
|---------------|--------------------|----------|-------------------------------|----------------------------------------------------------------------------|------------------------------------------------------------------------------------|
| Eye movements | Does not open eyes |          | Full conjugated eye movements | Transient<br>-nystagmus<br>-strabismus<br>-roving eye mov.<br>-sunset sign | Persistent<br>-nystagmus<br>-strabismus<br>-roving eye mov.<br>-downward deviation |

|   |    |   |    |    |    |   |    |   |     |
|---|----|---|----|----|----|---|----|---|-----|
| 1 | .5 | 2 | .5 | 3  | .5 | 4 | .5 | 5 |     |
| 0 | 0  | 0 | 0  | 91 | 3  | 6 | 0  | 0 | 6w  |
| 0 | 0  | 0 | 0  | 97 | 3  | 0 | 0  | 0 | 10w |

|                      |             |                                                             |                                                  |                                                           |                                                            |
|----------------------|-------------|-------------------------------------------------------------|--------------------------------------------------|-----------------------------------------------------------|------------------------------------------------------------|
| Auditory orientation | No reaction | Auditory startle; brightens and stills; no true orientation | Shifting of eyes, head might turn towards source | Prolonged head turn to stimulus; search with eyes; smooth | Turns head and eyes towards noise every time; jerky abrupt |
|----------------------|-------------|-------------------------------------------------------------|--------------------------------------------------|-----------------------------------------------------------|------------------------------------------------------------|

|   |   |   |   |    |   |    |   |   |     |
|---|---|---|---|----|---|----|---|---|-----|
| 0 | 0 | 6 | 0 | 71 | 6 | 17 | 0 | 0 | 6w  |
| 0 | 0 | 6 | 3 | 66 | 0 | 26 | 0 | 0 | 10w |

|                    |                                     |                                                                |                                                   |                                                 |                     |
|--------------------|-------------------------------------|----------------------------------------------------------------|---------------------------------------------------|-------------------------------------------------|---------------------|
| Visual orientation | Does not follow or focus on stimuli | Stills, focuses, follows briefly to the side but loses stimuli | Follows horizontally and vertically; no head turn | Follows horizontally and vertically; turns head | Follows in a circle |
|--------------------|-------------------------------------|----------------------------------------------------------------|---------------------------------------------------|-------------------------------------------------|---------------------|

|   |   |   |   |   |   |    |   |    |     |
|---|---|---|---|---|---|----|---|----|-----|
| 0 | 0 | 3 | 0 | 0 | 0 | 66 | 3 | 29 | 6w  |
| 0 | 0 | 0 | 0 | 3 | 3 | 29 | 0 | 66 | 10w |

|           |                             |                                |                                             |                           |                                |
|-----------|-----------------------------|--------------------------------|---------------------------------------------|---------------------------|--------------------------------|
| Alertness | Will not respond to stimuli | When awake, looks only briefly | When awake, looks at stimuli but loses them | Keeps interest in stimuli | Does not tire (hyper-reactive) |
|-----------|-----------------------------|--------------------------------|---------------------------------------------|---------------------------|--------------------------------|

|   |   |   |   |    |   |    |   |   |     |
|---|---|---|---|----|---|----|---|---|-----|
| 0 | 0 | 3 | 0 | 69 | 0 | 29 | 0 | 0 | 6w  |
| 0 | 0 | 6 | 0 | 40 | 3 | 51 | 0 | 0 | 10w |

|              |                                                  |                                      |                          |                           |                             |
|--------------|--------------------------------------------------|--------------------------------------|--------------------------|---------------------------|-----------------------------|
| Irritability | Quiet all the time, not irritable to any stimuli | Awakes, cries sometimes when handled | Cries often when handled | Cries always when handled | Cries even when not handled |
|--------------|--------------------------------------------------|--------------------------------------|--------------------------|---------------------------|-----------------------------|

|    |   |    |   |    |   |   |   |   |     |
|----|---|----|---|----|---|---|---|---|-----|
| 6  | 0 | 66 | 3 | 23 | 3 | 0 | 0 | 0 | 6w  |
| 23 | 0 | 69 | 0 | 9  | 0 | 0 | 0 | 0 | 10w |

|               |                                                |                                            |                                            |                                           |                                 |
|---------------|------------------------------------------------|--------------------------------------------|--------------------------------------------|-------------------------------------------|---------------------------------|
| Consolability | Asleep; awake, no crying; consoling not needed | Awake; cries briefly; consoling not needed | Awake; cries; becomes quiet when talked to | Awake; cries; needs picking up to console | Awake; cries cannot be consoled |
|---------------|------------------------------------------------|--------------------------------------------|--------------------------------------------|-------------------------------------------|---------------------------------|

|    |   |    |   |    |   |    |   |   |     |
|----|---|----|---|----|---|----|---|---|-----|
| 6  | 0 | 11 | 0 | 26 | 6 | 49 | 3 | 0 | 6w  |
| 23 | 0 | 9  | 3 | 26 | 6 | 34 | 0 | 0 | 10w |

|     |               |                     |                                   |  |                                    |
|-----|---------------|---------------------|-----------------------------------|--|------------------------------------|
| Cry | No cry at all | Whimpering cry only | Cries to stimuli but normal pitch |  | High pitched cry; often continuous |
|-----|---------------|---------------------|-----------------------------------|--|------------------------------------|

|    |   |   |   |    |   |   |   |   |     |
|----|---|---|---|----|---|---|---|---|-----|
| 6  | 0 | 0 | 0 | 89 | 0 | 3 | 3 | 0 | 6w  |
| 23 | 0 | 6 | 0 | 71 | 0 | 0 | 0 | 0 | 10w |
